# Supplementary material for: Relative Influence of Socioeconomic, Psychological and Sensory Characteristics, Physical Activity and Diet on 5-Year Weight Gain in French Adults
Source: MDPI journal article supplement (doi:10.3390/nu9111179), 2017-10-28
Supplement: s1 [file s1]

**Supplemental Table S1.** Dietary intake of food groups and physical activity at baseline and at five-year follow-up, NutriNet-Santé cohort.

|                                      | Baseline data<br>% or mean $\pm$ SD | Follow-up data<br>% or mean $\pm$ SD | <i>p</i> -value |
|--------------------------------------|-------------------------------------|--------------------------------------|-----------------|
| <i>Food group consumption, g/d</i>   |                                     |                                      |                 |
| Fruits and vegetables                | 547.1 $\pm$ 255.0                   | 542.1 $\pm$ 252.5                    | <0.0001         |
| Meat and processed meat              | 78.0 $\pm$ 56.6                     | 73.8 $\pm$ 54.8                      | 0.0002          |
| Fish                                 | 47.0 $\pm$ 47.8                     | 41.4 $\pm$ 45.8                      | <0.0001         |
| Starchy foods                        | 193.4 $\pm$ 110.9                   | 184.4 $\pm$ 102.0                    | <0.0001         |
| Whole grain products                 | 37.8 $\pm$ 52.8                     | 38.9 $\pm$ 52.0                      | 0.19            |
| Cheese                               | 39.9 $\pm$ 31.6                     | 40.0 $\pm$ 30.8                      | 0.0009          |
| Milk and yogurts                     | 176.4 $\pm$ 161.3                   | 157.3 $\pm$ 151.6                    | <0.0001         |
| Salted snacks, appetizers and sauces | 23.6 $\pm$ 22.6                     | 25.1 $\pm$ 22.6                      | 0.01            |
| Oil                                  | 9.8 $\pm$ 9.9                       | 9.9 $\pm$ 9.9                        | 0.87            |
| Butter and other added fats          | 13.8 $\pm$ 13.4                     | 14.5 $\pm$ 13.5                      | 0.85            |
| Fatty-sweet products                 | 104.2 $\pm$ 85.6                    | 99.1 $\pm$ 81.2                      | 0.002           |
| Sugar and sugary products            | 27.3 $\pm$ 27.1                     | 27.7 $\pm$ 26.6                      | 0.17            |
| Sweetened soft drinks                | 71.1 $\pm$ 167.3                    | 66.2 $\pm$ 155.4                     | <0.0001         |
| Alcoholic beverages                  | 116.6 $\pm$ 168.5                   | 113.8 $\pm$ 154.1                    | <0.0001         |
| Energy, kcal/d                       | 1990.7 $\pm$ 517.3                  | 1963.1 $\pm$ 486.9                   | <0.0001         |
| Physical activity, %                 |                                     |                                      | 0.0002          |
| Low                                  | 22.9                                | 21.4                                 |                 |
| Moderate                             | 42.1                                | 41.7                                 |                 |
| High                                 | 35.0                                | 36.9                                 |                 |

Baseline data n = 8014, five-year follow-up data n = 4103 for dietary intake, and n = 7732 for physical activity.

*p*-values are for comparison between baseline and five-year follow-up data and were determined using paired Student's *t*-test or Bowker's test of symmetry, as appropriate.

**Supplemental Table S2.** Correlation of baseline characteristics of included participants, NutriNet-Santé cohort, n = 8014.

|                             | Age                 | Educational level   | Income per consumption unit | Smoking status      | Physical activity   | Dieting to lose weight | Liking for fat-and-salt | Liking for fat-and-sweet | Cognitive restraint | Emotional eating | Uncontrolled eating |
|-----------------------------|---------------------|---------------------|-----------------------------|---------------------|---------------------|------------------------|-------------------------|--------------------------|---------------------|------------------|---------------------|
| Age                         | 1                   |                     |                             |                     |                     |                        |                         |                          |                     |                  |                     |
| Educational level           | -0.26090<br><0.0001 | 1                   |                             |                     |                     |                        |                         |                          |                     |                  |                     |
| Income per consumption unit | 0.22735<br><0.0001  | 0.30722<br><0.0001  | 1                           |                     |                     |                        |                         |                          |                     |                  |                     |
| Smoking status              | 0.10207<br><0.0001  | -0.06315<br><0.0001 | 0.00148<br>0.8946           | 1                   |                     |                        |                         |                          |                     |                  |                     |
| Physical activity           | 0.22217<br><0.0001  | -0.10409<br><0.0001 | 0.00985<br>0.3779           | 0.01053<br>0.3459   | 1                   |                        |                         |                          |                     |                  |                     |
| Dieting to lose weight      | -0.01483<br>0.1845  | -0.04317<br>0.0001  | -0.00740<br>0.5078          | 0.05433<br><0.0001  | -0.03445<br>0.0020  | 1                      |                         |                          |                     |                  |                     |
| Liking for fat-and-salt     | -0.21749<br><0.0001 | 0.04666<br><0.0001  | -0.08523<br><0.0001         | 0.01848<br>0.0980   | -0.17482<br><0.0001 | 0.02598<br>0.0200      | 1                       |                          |                     |                  |                     |
| Liking for fat-and-sweet    | -0.30263<br><0.0001 | 0.05075<br><0.0001  | -0.12542<br><0.0001         | -0.03097<br>0.0056  | -0.14578<br><0.0001 | 0.05164<br><0.0001     | 0.54366<br><0.0001      | 1                        |                     |                  |                     |
| Cognitive restraint         | 0.11034<br><0.0001  | -0.05804<br><0.0001 | 0.03785<br>0.0007           | 0.01900<br>0.0890   | 0.03625<br>0.0012   | 0.47958<br><0.0001     | -0.10797<br><0.0001     | -0.03280<br>0.0033       | 1                   |                  |                     |
| Emotional eating            | -0.18662<br><0.0001 | 0.00767<br>0.4927   | -0.08668<br><0.0001         | -0.06594<br><0.0001 | -0.10530<br><0.0001 | 0.32598<br><0.0001     | 0.09024<br><0.0001      | 0.19157<br><0.0001       | 0.30987<br><0.0001  | 1                |                     |

|                     |          |          |          |         |          |         |         |         |         |         |   |
|---------------------|----------|----------|----------|---------|----------|---------|---------|---------|---------|---------|---|
| Uncontrolled eating | -0.15916 | -0.00850 | -0.07990 | 0.01206 | -0.07418 | 0.24648 | 0.21751 | 0.23632 | 0.24010 | 0.59782 | 1 |
|                     | <0.0001  | 0.4468   | <0.0001  | 0.2804  | <0.0001  | <0.0001 | <0.0001 | <0.0001 | <0.0001 | <0.0001 |   |

---

Correlation coefficient and *p*-values of Pearson correlation for age, liking for fat-and-salt, liking for fat-and-sweet, cognitive restraint, emotional eating and uncontrolled eating scores, and Spearman correlation for educational level, income, smoking status, physical activity, and dieting to lose weight.

**Supplemental Table S3.** Comparison of baseline characteristics between included and excluded participants which have available anthropometric data at baseline and at five-year follow-up, n = 14,620, NutriNet-Santé cohort, May 2010.

|                                             | Included participants<br>n = 8014 | Excluded participants<br>N = 6606 | p-value |
|---------------------------------------------|-----------------------------------|-----------------------------------|---------|
| <i>General characteristics</i>              |                                   |                                   |         |
| Age, y                                      | 51.8 ± 13.1                       | 50.0 ± 13.6                       | <0.0001 |
| Women, %                                    | 71.5                              | 73.3                              | 0.019   |
| BMI, kg/m <sup>2</sup>                      | 23.8 ± 4.2                        | 24.0 ± 4.4                        | 0.056   |
| Educational level, % <sup>1</sup>           |                                   |                                   | <0.0001 |
| Elementary school                           | 2.8                               | 3.6                               |         |
| Secondary school                            | 31.4                              | 35.8                              |         |
| College graduate                            | 29.7                              | 29.9                              |         |
| Advanced degree                             | 36.1                              | 30.7                              |         |
| Income per consumption unit, € <sup>1</sup> | 2377.8 ± 1218.9                   | 2241.8 ± 1223.7                   | <0.0001 |
| Smoking status, % <sup>1</sup>              |                                   |                                   | <0.0001 |
| Never-smoker                                | 49.7                              | 49.6                              |         |
| Former smoker                               | 39.3                              | 37.5                              |         |
| Current smoker                              | 11.0                              | 12.9                              |         |

p-values are for comparison between included and excluded participants and were determined using Student's *t*-test or chi-square test as appropriate.

<sup>1</sup> For 14,190 individuals.

**Supplemental Table S4.** Comparison of baseline characteristics between included and excluded participants of the analyses, NutriNet-Santé cohort, n = 49,818, May 2010.

|                                             | Included participants<br>n = 8014 | Excluded participants<br>n = 41,804 | p-value |
|---------------------------------------------|-----------------------------------|-------------------------------------|---------|
| <i>General characteristics</i>              |                                   |                                     |         |
| Age, y                                      | 51.8 ± 13.1                       | 43.9 ± 14.5                         | <0.0001 |
| Women, %                                    | 71.5                              | 77.8                                | <0.0001 |
| BMI, kg/m <sup>2</sup> <sup>1</sup>         | 23.8 ± 4.2                        | 23.9 ± 4.7                          | 0.24    |
| Educational level, % <sup>2</sup>           |                                   |                                     | <0.0001 |
| Elementary school                           | 2.8                               | 3.1                                 |         |
| Secondary school                            | 31.4                              | 34.9                                |         |
| College graduate                            | 29.7                              | 30.3                                |         |
| Advanced degree                             | 36.1                              | 31.7                                |         |
| Income per consumption unit, € <sup>2</sup> | 2377.8 ± 1218.9                   | 2098.1 ± 1186.1                     | <0.0001 |
| Smoking status, % <sup>2</sup>              |                                   |                                     | <0.0001 |
| Never-smoker                                | 49.7                              | 49.1                                |         |
| Former smoker                               | 39.3                              | 34.3                                |         |
| Current smoker                              | 11.0                              | 16.6                                |         |

*p*-values are for comparison between included and excluded participants and were determined using Student's *t*-test or chi-square test as appropriate.

<sup>1</sup> For 31,407 individuals.
